1 High carnivore population density highlights the  
2 conservation value of industrialised sites

3

4 Daan J. E. Loock<sup>a\*</sup>, Samuel T. Williams<sup>b,c,d\*</sup>, Kevin W. Emslie<sup>b</sup>, Wayne S. Matthews<sup>e</sup>, Lourens  
5 H. Swanepoel<sup>b</sup>

6

7 <sup>a</sup>Faculty of Natural and Agricultural Sciences, University of the Free State, 205 Nelson Mandela  
8 Drive, Park West, Bloemfontein, 930, South Africa

9 <sup>b</sup>Department of Zoology, School of Mathematical & Natural Sciences, University of Venda,  
10 Private Bag X5050, Thohoyandou, 0950, South Africa

11 <sup>c</sup>Department of Anthropology, Durham University, Durham, DH1 3LE, United Kingdom

12 <sup>d</sup>Institute for Globally Distributed Open Research and Education (IGDORE)

13 <sup>e</sup>Department of Environmental Sciences, College of Agriculture & Environmental Sciences,  
14 University of South Africa, P.O. Box 392, Pretoria, 0003, South Africa

15 \*These authors contributed equally to this work, and are listed in alphabetical order

## 16 **Abstract**

17 As the environment becomes increasingly altered by human development, the importance of  
18 understanding the ways in which wildlife interact with modified landscapes is becoming clear.  
19 Areas such as industrial sites are sometimes presumed to have little conservation value, but many  
20 of these sites have areas of less disturbed habitats around their core infrastructure, which could  
21 provide ideal conditions to support some species, such as mesocarnivores. We conducted the first  
22 assessments of the density of serval (*Leptailurus serval*) at the Secunda Synfuels Operations plant,  
23 South Africa. We ran three camera trap surveys to estimate serval density using a spatially explicit  
24 capture recapture framework. Servals occurred at densities of 76.20-101.21 animals per 100 km<sup>2</sup>,  
25 which are the highest recorded densities for this species, presumably due to high abundance of  
26 prey and the absence of persecution and/or competitor species. Our findings highlight the  
27 significant conservation potential of industrialised sites, and we suggest that such sites could help  
28 contribute towards meeting conservation goals.

29

## 30 **Keywords**

31 Anthropocene, abundance, carnivore, felidae, private land

32

## 33 **1 Introduction**

34 Over the last centuries, there have been rapid and intense environmental changes caused by  
35 increasing human numbers, technological advances and industrialisation (United Nations  
36 Environment Programme 2012). Human alterations on the environments have resulted in a decline  
37 in biodiversity, and are elevating extinction rates of species at a global scale (Chapin et al. 2000).  
38 Currently more than 75% of the terrestrial surface is impacted by humans (Ellis et al. 2010; Ellis  
39 et al. 2013). These human activities are affecting biodiversity and ecosystems on various scales as  
40 well as modifying existing habitats, creating unique urban environments and novel ecosystems  
41 (Hobbs et al. 2006; Williams et al. 2009; Barbosa et al. 2010). In many cases, biodiversity can be

42 positively related to human population at a regional scale due, for instance, to an enhanced spatial  
43 heterogeneity between rural and urban environments, and the introduction of exotic species  
44 (McKinney 2002; Sax and Gaines 2003). The influence of these modifications depends on both  
45 the scale and the organisms involved (Barbosa et al. 2010).

46 Even within the most densely populated and intensively used areas, including urban landscapes,  
47 humans rarely utilise all land, and tend to retain significant green or unused areas. These “green  
48 spaces” hold ecological potential, and can reduce biodiversity loss by managing habitats to support  
49 endangered species (Jackson et al. 2014), although, further research is necessary to understand the  
50 impacts of these processes (Northrup and Wittemyer 2013) transformed landscapes lead to  
51 unpredicted changes in species communities, posing new challenges to conservation and resource  
52 management (Lindenmayer et al. 2008)

53 One species that that could be impacted by development is the serval (*Leptailurus serval*). The  
54 serval is a medium-sized carnivore that feeds primarily on rodents (Ramesh and Downs 2015), and  
55 is dependent on wetland habitats (Ramesh and Downs 2015/2) that are being rapidly lost globally  
56 (Dixon et al. 2016). The species is listed as Least Concern on the global IUCN Red List of  
57 threatened species (Thiel 2015), but is considered Near Threatened in South Africa (Friedmann  
58 and Daly 2004). Serval have declined throughout their range (Ramesh and Downs 2013), and the  
59 principal threats to the species are loss and degradation of their wetland habitat (Thiel 2011), trade  
60 of their skins (Kingdon and Hoffmann 2012), and persecution in response to perceived predation  
61 of poultry (Henley 1997), although they only rarely prey on livestock (Thiel 2015). Like many  
62 other felids, serval maintain stable home ranges where males typically have larger ranges than  
63 females (Sunquist and Sunquist 2002; Ramesh et al. 2015). While various factors (e.g. resource  
64 availability and physical attributes; Kie et al. 2002) affect carnivore home range size, in serval the  
65 availability of wetland habitats seems to be a key factor (Bowland 1990). Data on species ecology  
66 are critical to planning wildlife management and implementing conservation initiatives (Barrows  
67 et al. 2005), but there have been few studies on serval ecology, and conservation initiatives are  
68 hindered by poor knowledge of abundance (Ramesh and Downs 2013).

69 In this study, we firstly aimed to estimate the population density of servals at the Secunda Synfuels

70 Operations plant, an industrial site in Mpumalanga province, South Africa, that includes a natural  
71 wetland within its boundaries (Fig. 1). We also aimed to assess the structure of this serval  
72 population, in order to make inferences about population dynamics.

73

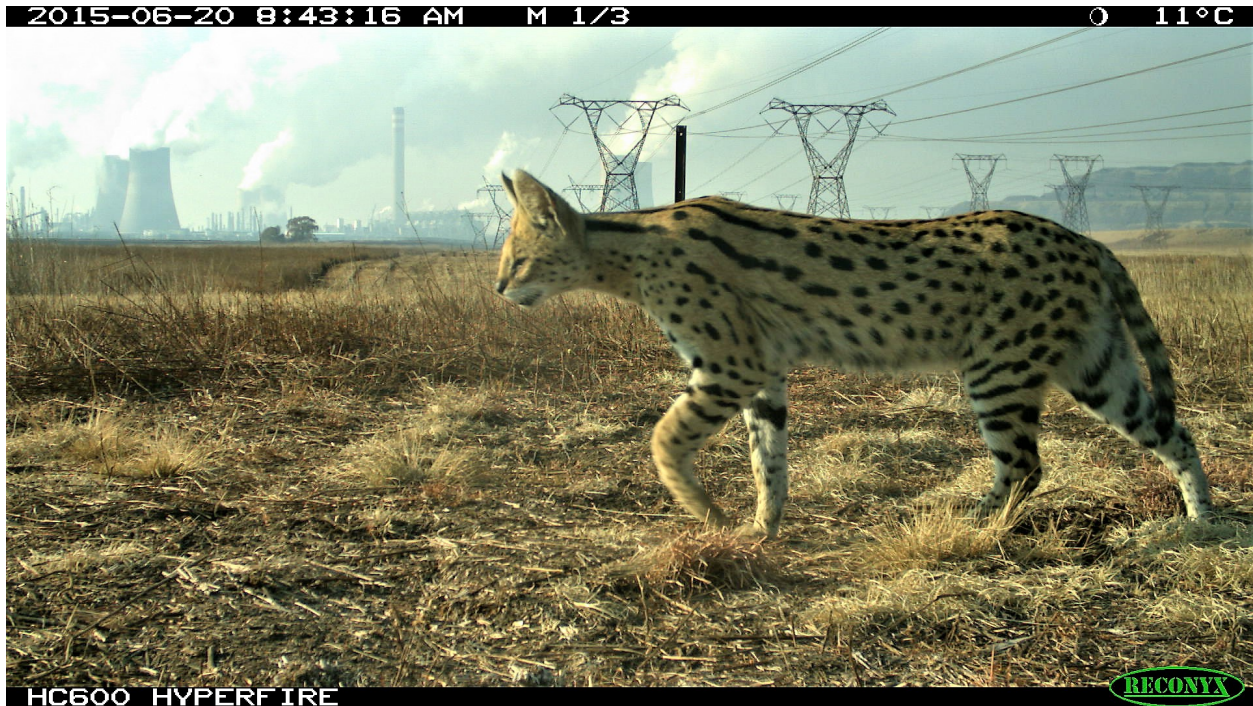

74

75 Fig. 1. Camera trap image of a serval at the heavily industrialised Secunda Synfuels Operations  
76 plant in South Africa, recorded by Reconyx Hyperfire HC600 camera.

77

## 78 **2 Materials and Methods**

### 79 **2.1 Ethics statement**

80 This project is registered at the Animal Care and Use Committee of the University of Pretoria  
81 (Ethical clearance number: EC040-14 and V101-17) and the Mpumalanga Tourism and Parks  
82 Agency (Permit number: 5467 and 7282).

83

## 84 2.2 Study Area

85 The Secunda Synfuels Operations plant (hereafter referred to as Secunda) is a division of Sasol  
86 South Africa (PTY) Ltd, and is located in Secunda, Mpumalanga province, South Africa (Fig. 2).  
87 It consists of a primary area (a petrochemical plant) and a secondary area (which is made up of  
88 surrounding natural and disturbed vegetation). The secondary area (hereafter referred to as the  
89 study site) of Secunda Synfuels Operations covers an area of 79.4 km<sup>2</sup> (central coordinates  
90 26°31'45.62" S, 29°10'31.55" E). The secondary area is a gently to moderately undulating  
91 landscape on the Highveld plateau, supporting short to medium-high, dense, tufted grasses at  
92 different levels of disturbance. In places, small scattered wetlands (both man-made and natural),  
93 narrow stream alluvia, and occasional ridges or rocky outcrops interrupt the continuous grassland  
94 cover. Much of the study site (38%) is classified as relatively untransformed habitat, which is  
95 managed in accordance to Secunda Synfuels Operations Biodiversity Management Plan to  
96 conserve the natural areas from degradation and improve the ecological functionality of the  
97 disturbed land. The vegetation type is classified as Soweto Highveld Grassland (Rutherford et al.  
98 2006), and the area falls into the Grassveld Biome (Mucina and Rutherford 2006). We used  
99 satellite images (Google 2014) to digitise the boundaries of four major habitat types (Disturbed,  
100 Grassland, Grass & wetland, and Wetland), which we used as site covariates in subsequent  
101 analyses.

102 The relatively unspoiled grassland represents the best form of Soweto Highveld Grassland on site.  
103 The characteristic species include *Cymbopogon pospischilii*, *Pollichia campestris*, *Walafrida*  
104 *densiflora*, *Eragrostis chloromelas*, *Gomphrena celosioides*, *Craibia affinis* and *Cineraria cf.*  
105 *savifraga* (Matthews 2016). The grassland habitat has a low basal cover due to grazing and during  
106 the rainy season the grass phytomass averages around 3-4 tons per hectare (de Wet 2016). The  
107 grass and wetland habitat occurs mostly within the transition zones or dry floodplains not typical  
108 of either wetland habitat or grassland habitat. These areas have a medium cover, and include some  
109 species typical of wetlands. The wetland habitat is dominated by species indicative of wetland  
110 zones and moist soils (Linström 2012). The phytomass here can be in excess of 5 tonnes per  
111 hectare, and the growth is up to 1.5 meters above the ground level. The disturbed habitat is  
112 dominated by weedy forbs with medium to very high density. The impact of the weedy forbs is a



113 thicket of basal cover on the surface and up to 1.5 meters above ground level.

114

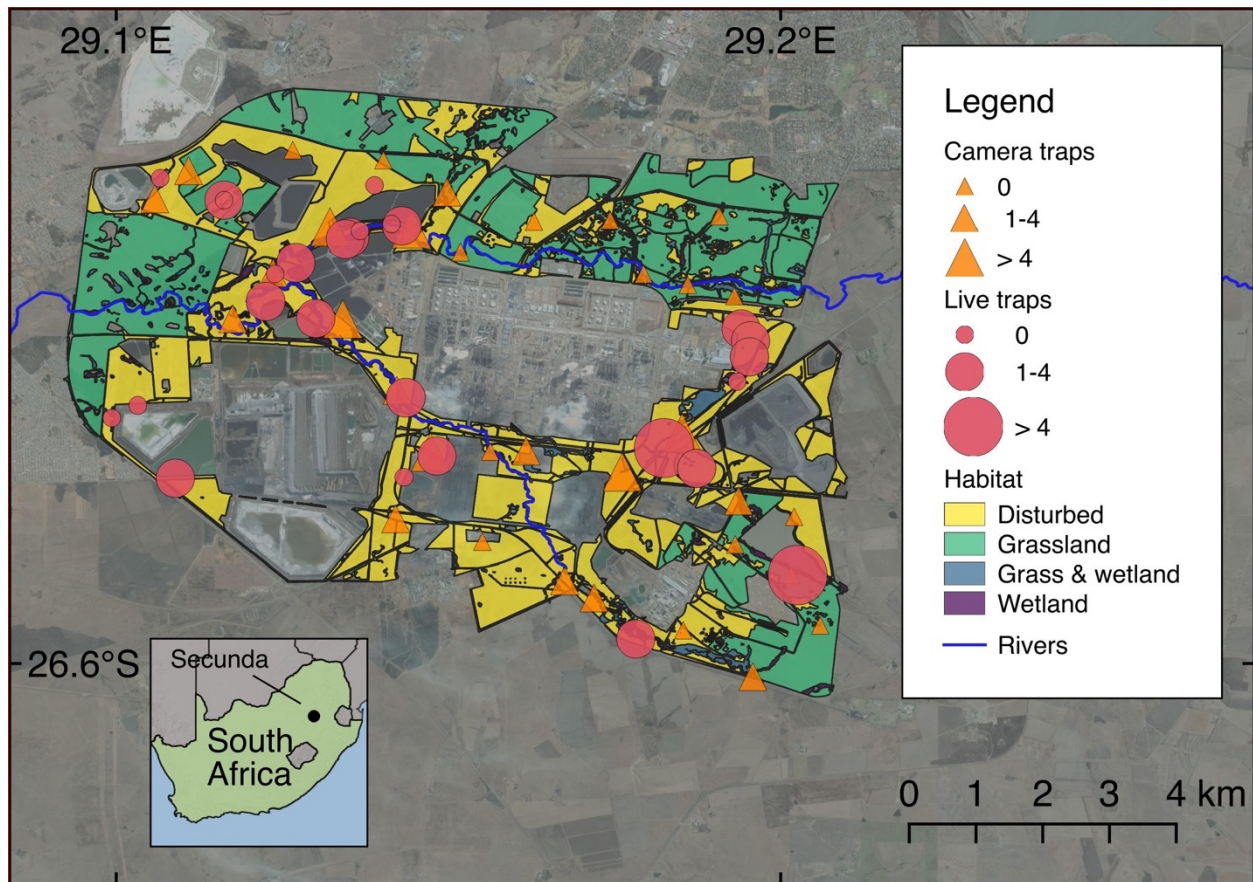

115

116 Fig. 2. Map showing the locations of camera traps and live traps at the Secunda Synfuels  
117 Operations plant in South Africa. The size of points representing camera traps and live traps  
118 diameter is proportional to the number of individual serval captured. Major habitat types are also  
119 shown, along with satellite images illustrating the human-modified landscapes. Wetland and Grass  
120 & wetland habitat types are difficult to visualise at this scale as they occur in very close proximity  
121 to rivers.

### 122 2.3 Camera trapping

123 The study was underpinned by a spatially explicit capture-recapture (SECR) framework. For  
124 SECR studies it is recommended that the camera trapping polygon be larger than the male home

125 range size of the target species (Tobler and Powell 2013). The largest home range recorded for  
126 serval in South Africa (measured using minimum convex polygon) was 31.5 km<sup>2</sup> (Bowland 1990).  
127 We first subdivided the study area in 34 grid cells measuring 1.2 km x 1.2 km (roughly equivalent  
128 to the size of smallest recorded serval home range (Ramesh and Downs 2015)). We then  
129 established an array of Reconyx Hyperfire HC600 camera traps at 34 camera trap stations (one in  
130 each grid cell) over an area of 79.4 km<sup>2</sup> throughout the study site (Fig. 2). Mean spacing between  
131 camera traps was 1.2 km, and we placed camera traps on game trails and roads to maximise the  
132 probability of photographing servals, and to facilitate access for camera maintenance. We mounted  
133 camera traps on fence posts, 50 cm above the ground and 1 to 2 m from the trail. Vegetation in  
134 front of the camera traps was cleared to reduce false triggers.

135 We conducted three surveys from 2014 to 2015, with each survey running for 40 days (see Table  
136 1 for dates). Camera traps were programmed to operate 24 hours per day, with a one minute delay  
137 between detections. We regarded each 24 hours as an independent sample. Camera trap positions  
138 were kept constant within each survey and between surveys. We visited each camera trap on a  
139 weekly basis to download the images, change batteries, and ensure the cameras remained in  
140 working order. Camera Base 1.4 (Tobler 2010) was used to catalogue the camera trap images.  
141 Since one of the assumptions of SECR models is that individuals are correctly identified, three  
142 authors (DL, WM, KE) identified individual serval in triplicate using distinct individual markings  
143 such as spot patterns and scars.

#### 144 2.4 Live trapping

145 Live trapping formed part of a larger study investigating serval spatial and disease ecology. Due  
146 to low recapture success we did not use these data to estimate densities. Rather, we used the live  
147 trapping data to estimate the capture rate and population structure of the serval population to  
148 validate our camera trapping study. Servals were trapped using 16 steel trap cages measuring 200  
149 cm x 80 cm x 80 cm, deployed at 29 trap sites throughout the study site. Traps were baited with  
150 dead helmeted guineafowl (*Numida meleagris*) for a total of 287 trap nights between 2014 and  
151 2017. Servals were immobilised by a veterinarian using one of the following drug combinations,  
152 as part of a study into optimising immobilisation protocols (Blignaut et al. in review): 1) KBM-5:

153 ketamine (5.0 mg kg<sup>-1</sup>), butorphanol (0.2 mg kg<sup>-1</sup>), and medetomidine (0.08 mg kg<sup>-1</sup>); 2) KBM-8:  
154 ketamine (8.0 mg kg<sup>-1</sup>), butorphanol (0.2 mg kg<sup>-1</sup>), and medetomidine (0.08 mg kg<sup>-1</sup>); 3) ZM:  
155 zoletil (5.0 mg kg<sup>-1</sup>) and medetomidine (0.065 mg kg<sup>-1</sup>); 4) AM: alfaxalone (0.5 mg kg<sup>-1</sup>) and  
156 medetomidine (0.05 mg kg<sup>-1</sup>); or 5) ABM: alfaxalone (2.0 mg kg<sup>-1</sup>), butorphanol (0.2 mg kg<sup>-1</sup>),  
157 and medetomidine (0.08 mg kg<sup>-1</sup>). Drugs were administered intramuscularly using a blowpipe. If  
158 serval showed signs of inadequate drug dosages, they were topped-up with the same combinations.  
159 Where administered, medetomidine and butorphanol were pharmacologically antagonised with  
160 atipamezole (5 mg mg<sup>-1</sup> medetomidine) and naltrexone (2 mg mg<sup>-1</sup> butorphanol), respectively.  
161 After examination, animals were released at the same site where they were captured.

162 Animals with a mass of 3-8 kg were considered to be juveniles (up to approximately six months  
163 old, to the stage where the canines are developed). Servals with a mass of 8-11 kg were categorised  
164 as sub-adults (6-12 months old, just before they are sexually mature). Animals 11-15 kg  
165 (approximately 12 to 18 months and older) were considered to be adults (Sunquist and Sunquist  
166 2002).

## 167 2.5 Data analysis

168 We estimated serval density by fitting likelihood based SECR (Efford 2004) models to camera  
169 trap data using the package secr (Efford 2017) in R version 3.4.3 (R Development Core Team  
170 2017). The advantage of SECR models over traditional density estimation methods is that they do  
171 not require the use of subjective effective trapping areas, and instead estimate density directly  
172 (Tobler and Powell 2013). This is achieved by estimating the potential animal activity centres in a  
173 predefined area using spatial location data from the camera traps (Efford 2004). The spacing of  
174 the activity centres is related to the home range size of the animals, and as such the detection  
175 probability of each animal is a function of the distance from the camera trap to the activity centre.  
176 A key assumption of SECR models is that such activity centres are stationary for the period of  
177 study (closed population; Royle et al. 2015). Since serval are long lived animals exhibiting  
178 territoriality and we had relatively short survey period we believe that our study did not violate  
179 this assumption (van Aarde et al. 1986, Geertsema 1985).

180 Detection rate was modelled using a spatial detection function which is governed by two



181 parameters; the encounter rate at the activity centre (detection probability;  $\lambda_0$ ) and a scale parameter  
182 ( $\sigma$ ) which describes how the encounter rate declines with increased distance from the activity  
183 centre (Efford 2004). We tested for three different spatial detection functions since these might  
184 better model the utilisation distribution of the home range: half-normal, hazard and exponential.  
185 We ranked models based on Akaike information criterion corrected for small sample sizes (AICc),  
186 and found overwhelming support for the hazard rate spatial detection function (Table S3). All  
187 subsequent models were fitted with the hazard rate detection function.

188 We fitted SECR models by maximising the full likelihood where the scale parameter was kept  
189 constant, but we let the encounter rate vary by biologically plausible hypotheses to deal with  
190 heterogeneity in detection. The scale parameter is largely affected by home range size, and hence  
191 the sex of the animal (Sollmann et al. 2011/3). However, we were unable to determine the sex of  
192 individual serval from the photographs, and could therefore not model variation in the scale  
193 parameter due to sex. We first fitted a model in which we allowed the scale parameter to vary by  
194 year and season. This is because we expected that movement might be constrained in the wet  
195 season due to increased food resources (Courbin et al. 2013). We then fitted a model in which  
196 serval showed a behavioural response at  $\lambda_0$ , as animals can become trap happy or trap shy (Wegge  
197 et al. 2004). Thirdly, we tested the effect of habitat on  $\lambda_0$ , as serval prefer wetlands (Bowland  
198 1990), which would result in higher detections in these habitats. We captured camera-specific  
199 habitat variables from the vegetation classification. Fourth, we coded each year and season as a  
200 separate session, and used the multi-session framework in secr to test the effect of season on serval  
201 density, with constant  $\lambda_0$ . We lastly fitted a model in which  $\lambda_0$  varied with both season and habitat  
202 type. These models were contrasted against a null model, in which all variables were kept constant.

203 We used AICc to rank models, considering models with  $\Delta AICc < 2$  to have equal support. We  
204 applied model averaging to the top models with equal support to reduce uncertainty (Burnham and  
205 Anderson 2004). The buffer width for analysis was set at 3,000 m, which resulted in the inclusion  
206 of an informal housing settlement and a residential area in the state space buffer. Since it is highly  
207 unlikely that serval will utilise these areas (as well as the primary industrial area), we excluded  
208 these areas (constituting approximately 25% of the area of the buffer) from the state space buffer  
209 (Fig. S1). All data and R code used for analysis are available in (Loock et al. 2018).

210

## 211 **3 Results**

### 212 **3.1 Camera trapping**

213 During a camera trapping effort of 3,590 trap days, we photographed a total 61 unique servals  
214 spanning three separate sessions (Table 1). The number of individual serval captures did not differ  
215 greatly between sessions, although the highest number was captured during the wet season of 2015  
216 (Table 1, Fig. S2).

217 The two most parsimonious SECR models ( $\Delta AICc < 2$ ) both indicated that the encounter rate ( $\lambda_0$ )  
218 was affected by habitat type (Table S3). While there was some support for serval density being  
219 session dependant ( $\Delta AICc = 0.098$ ;  $AICc w = 0.487$ ; Table S3), there was also support for no  
220 effect of session ( $AICc w = 0.471$ , Table S3). To estimate serval density we therefore averaged the  
221 two most parsimonious models ( $\Delta AICc < 2$ ). Serval population density estimates at the study site  
222 varied from 76.20 (SE=22.22) to 101.21 (SE=20.66) animals per 100 km<sup>2</sup> (Fig. 3a). Highest  
223 estimates were recorded during the dry seasons (Winter 2014: 101.21 [SE=20.66] & Winter 2015:  
224 97.38 [SE=18.71]) compared to the single summer season (Summer 2015: 76.20 [SE=22.21]; Fig.  
225 3a). Vegetation type had a significant effect on serval encounter rates, where grassland had the  
226 lowest encounter rate (0.04 [SE=0.01]) compared to wetlands with the highest (0.19 [SE=0.03];  
227 Fig. 3b).

228

229

230

231

232

233

234 Table 1. Summary of camera trapping effort at the study site during the winter of 2014, summer  
 235 of 2015 and winter of 2015.

| Session     | Number of days | Number of trap sites | Polygon size (km <sup>2</sup> ) | Photos identifiable | Number of adult serval identified | Captures | Recaptures |
|-------------|----------------|----------------------|---------------------------------|---------------------|-----------------------------------|----------|------------|
| 2014 Winter | 40             | 34                   | 79.4                            | 332                 | 19                                | 57       | 32         |
| 2015 Summer | 40             | 34                   | 79.4                            | 580                 | 34                                | 87       | 41         |
| 2015 Winter | 40             | 34                   | 79.4                            | 672                 | 31                                | 82       | 48         |
| Mean        | 40             | 34                   | 79.4                            | 528                 | 28                                | 75       | 40         |
| Total       | 120            | 34                   | 79.4                            | 1584                | 84                                | 226      | 121        |

236

237

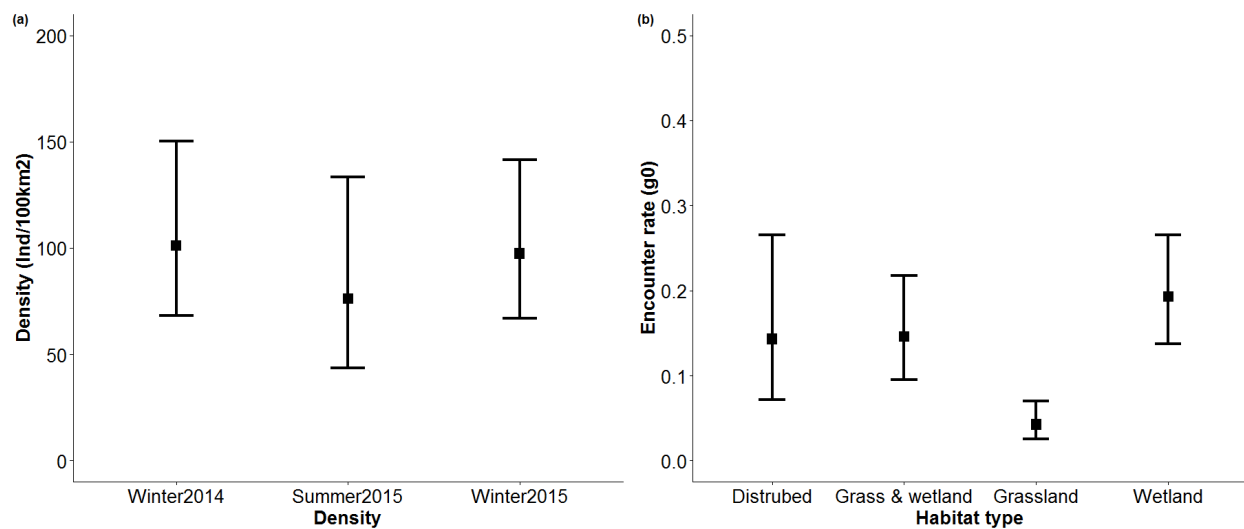

238

239 Fig. 3. Serval density estimates for each camera trap survey conducted at the study site indicating

240 a) influence of season on density, and b) effect of habitat type on serval encounter rate. Error bars  
241 represent asymmetric 95% confidence intervals.

### 242 3.2 Live trapping

243 We captured 65 individuals, of which four were also recaptured on a second occasion. This  
244 comprised of a total of 26 adult males, 19 adult females, 11 sub-adults, and seven juvenile animals.  
245 This resulted in a mean trapping success rate of 0.21 captures per trap night (excluding recaptures).  
246 Trapping success rate varied little between sessions (Fig. 4).

247

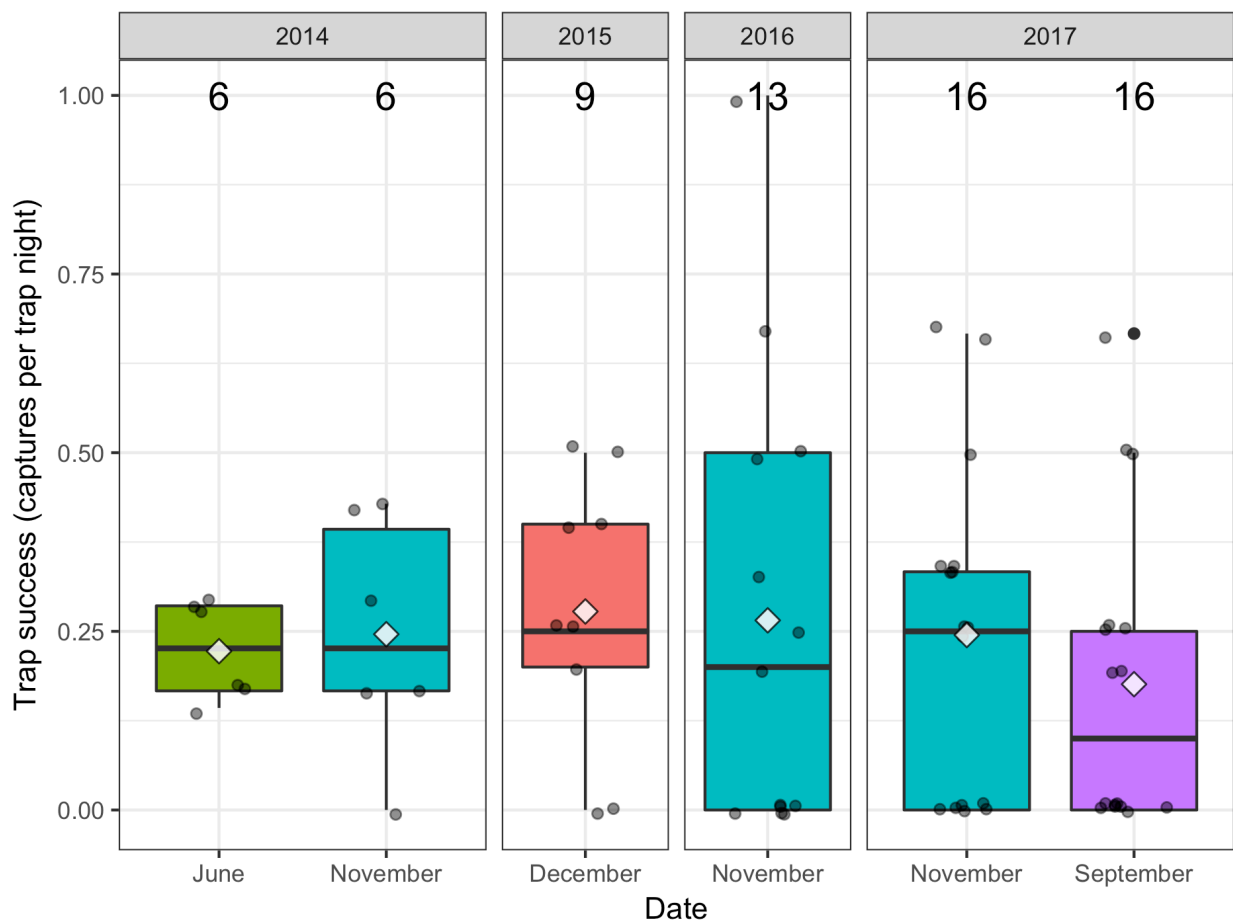

248

249 Fig. 4. Box plot showing trap success rate for serval captures at the study site from 2014 to 2017.

250 The middle bars represent the median value, white diamonds represent means, the top and bottom

251 of the boxes represent the 75th and 25th percentiles respectively, the whiskers represent the  
252 maximum and minimum values, circles show the individual data points, and numbers give the  
253 sample size.

254

## 255 **4 Discussion**

### 256 **4.1 Comparative serval density**

257 In our three camera trap surveys at the study site at Secunda, we estimated serval population  
258 density to be 101.21, 76.20, and 97.38 animals per 100 km<sup>2</sup>, which are the highest densities  
259 recorded in the literature. Live trapping rates at Secunda were also extremely high (0.21 captures  
260 per trap night). Although there are no data available for serval live trapping rates in the literature,  
261 rates of 0.0015-0.017 captures per trap night are much more typical for other mesocarnivores such  
262 as jaguarundi (*Puma yagouaroundi*), oncilla (*Leopardus tigrinus*), tayra (*Eira barbara*), and feral  
263 cat (*Felis silvestris catus*) using cage traps (Molsher 2001; Michalski et al. 2007; McGregor, H W,  
264 Hampton J O, Lisle, D, Legge, S 2016), which are an order of magnitude lower than serval live  
265 capture rates at Secunda. Although great care must be taken when comparing trapping rates  
266 between different locations and species, the live trap rates at Secunda nevertheless appear to be  
267 consistently very high, which supports the high population densities estimated using camera trap  
268 data.

269 Our high estimates of serval densities at Secunda contrast with more typical densities reported in  
270 Luambe National Park in Zambia (9.9 animals per 100 km<sup>2</sup> (Thiel 2011), Bwindi Impenetrable  
271 National Park in Uganda (9 animals per 100 km<sup>2</sup> (Andama (2000), cited in Kingdon and Hoffmann  
272 2012)), and on farmland in the Drakensberg Midlands, South Africa (6.5 animals per 100 km<sup>2</sup>  
273 (Ramesh and Downs 2013)). However, there is evidence that serval can attain such high densities.  
274 For example, (Geertsema 1985) reported a serval density of 41.66 animals per 100 km<sup>2</sup> in the  
275 Ngorongoro Crater, Tanzania.

276 High population densities of other carnivore species have also been reported in human-modified  
277 habitats such as urban areas. Coyotes (*Canis latrans*), raccoons (*Procyon lotor*), red foxes (*Vulpes*



278 *vulpes*), and Eurasian badgers (*Meles meles*), for example, all thrive in urban landscapes (Bateman  
279 and Fleming 2012; Scott et al. 2014). Carnivore species able to adapt to urban environments often  
280 succeed in these areas due to high food availability, favourable climatic effects, and the reduced  
281 threat of intraguild predation because of the absence of larger apex predators (Fuller et al. 2010).  
282 We provide several, not necessarily mutually exclusive theories, to explain the high serval density  
283 we observed at Secunda.

284 Firstly, servals in the Secunda are protected from persecution. Such persecution can have large  
285 effects on carnivore densities. For example leopards (*Panthera pardus*) in livestock/game farming  
286 areas only attain around 20% of their potential density compared to protected areas free from  
287 persecution (Balme et al. 2010). Servals outside protected areas are frequently persecuted by  
288 livestock farmers (Henley 1997) as they are often mistakenly blamed for livestock predation  
289 (Skinner and Chimimba 2005), but at Secunda this is not the case, which could lead to higher  
290 population densities (Cardillo et al. 2004). Secondly, servals are the largest remaining carnivore  
291 species occurring at ecologically effective densities at Secunda, so there is little interspecific  
292 competition from larger carnivores. In other areas, the presence of other medium- and large-bodied  
293 carnivores could otherwise limit serval population densities (through intraguild predation), so their  
294 absence can lead to mesopredator release, such as through increased survival of young (Ritchie  
295 and Johnson 2009). For example, the absence of large carnivores such as lions (*Panthera leo*) and  
296 spotted hyaenas (*Crocuta crocuta*) in northern South Africa is thought to have led to the  
297 competitive release of cheetahs (*Acinonyx jubatus*) (Marnewick et al. 2007). Thirdly, the  
298 abundance of modified habitat at Secunda could also facilitate high serval population density.  
299 Disturbed habitat can be highly productive (Williams et al. 2018), and provide shelter and food  
300 resources for species such as rodents that serval prey upon (Taylor 2013), providing abundant food  
301 and in turn supporting a high abundance of serval.

302 Although the population density of serval recorded at Secunda was exceptionally high, the  
303 structure of this serval population was similar to those at other sites. The number of adult males  
304 per 100 adult females captured in live traps at Secunda was 137, which is within the range reported  
305 in the literature (50-220 in KwaZulu-Natal (Bowland 1990; Ramesh et al. 2016); 100 in the  
306 Ngorongoro Crater, Tanzania (Geertsema 1985)). Similarly, the proportion of the population at

307 Secunda that was comprised of juvenile and sub-adult individuals (0.69) was very similar to other  
308 populations (0.64 in the Ngorongoro crater; (Geertsema 1985)). It therefore appears that although  
309 the serval population density at Secunda is very high, the structure of the population is not unusual,  
310 which is not indicative of a rapidly declining or increasing population size (Harris et al. 2008),  
311 supporting our findings that the serval population density at Secunda appears to be relatively  
312 stable. Although servals appear to thrive in close proximity to such a heavily industrialised site,  
313 we suggest that further research is conducted to identify any potential effects of industrial activity  
314 (Raiter et al. 2014), such as the influence of noise and air pollution on the physiology and  
315 behaviour of wildlife in the vicinity (Morris-Drake et al. 2017).

316 While we aimed to apply robust modelling, we address some caveats from our dataset. First, we  
317 were not able to include sex as a covariate in the SECR models, which could affect the density  
318 estimates. Simulation models suggest that excluding sex covariates can cause a negative bias in  
319 density estimates, thus overestimating density (Tobler and Powell 2013). As such it seems that  
320 estimates derived here can be regarded as optimistic. Nonetheless, the scale parameter used in the  
321 models ( $\sigma = 268$  m) falls within range of observed daily movements of serval elsewhere (538m  
322 (Perrin 2002); 0-500m (van Aarde et al. 1986)). This suggests that the estimated 95% confidence  
323 interval should encompass the true estimates, albeit on the lower side of interval. Secondly, the  
324 placement of the camera traps was constrained by the vegetation conditions, in order to enable  
325 access to camera traps by foot or by vehicle. This could have introduced sampling bias as traps  
326 were not placed at random in relation to activity centres. However, maximising the detection of  
327 individuals in order to obtain adequate samples outweighs the potential bias caused by biased trap  
328 placement (Tobler and Powell 2013). Finally, there might be concern regarding population closure  
329 since our trapping period spanned 40 days and we had a high percentage of single detections. We  
330 highlight that SECR models appear to be robust against transience (Royle et al. 2015) and that  
331 longer surveys tend to yield more robust estimates than short periods (Jędrzejewski et al. 2016).

#### 332 4.2 The impacts of modified landscapes

333 In recent years the expansion of infrastructure has progressed more rapidly than during any other  
334 period in history (Laurance et al. 2015), and industrial sites such as mines and fossil fuel processing

335 plants are not the only developments that could have impacts on wildlife. The growing road  
336 network, for example (Ibisch et al. 2016), has large direct and indirect ecological impacts such as  
337 causing wildlife-vehicle collisions, polluting the environment, disrupting animal migrations and  
338 gene flow, and providing access to invading species and humans, facilitating further degradation  
339 (Laurance et al. 2009; Sloan et al. 2016). The rapidly growing number of hydroelectric dams (Zarfl  
340 et al. 2014) increases the risk of habitat fragmentation through deforestation, in addition to  
341 disrupting freshwater ecosystems (Finer and Jenkins 2012). Similarly, the development of urban  
342 and agricultural areas fragments and destroys habitats (Ripple et al. 2014). Consequently,  
343 delineating how the changing environment affects biodiversity will be an increasingly important  
344 theme of future research.

345 But not all the impacts of anthropogenic development on wildlife are negative. The high serval  
346 densities at Secunda are remarkable as the site is very heavily industrialised. Nature reserves and  
347 exclusion zones surrounding industrialised areas such as Secunda have the potential to balance  
348 resource utilisation with biodiversity conservation (Edwards et al. 2014). Some industrial  
349 installations such as mines have created nature reserves, which can benefit biodiversity  
350 conservation. The Mbalam iron ore mine in Cameroon has set aside land to protect rare forest  
351 mammals (Edwards et al. 2014). Private nature reserves created around the Venetia diamond mine  
352 in South Africa and the Jwaneng diamond mine in Botswana support a broad complement of large  
353 mammals including elephants (*Loxodonta africana*), lions (*Panthera leo*), leopards (*Panthera*  
354 *pardus*), cheetahs, African wild dogs (*Lycaon pictus*), brown hyaenas (*Hyaena brunnea*), and  
355 black-backed jackals (*Canis mesomelas*) (Smallie and O’connor 2000; Kamler et al. 2007; Houser  
356 et al. 2009; Jackson et al. 2014). The Sperrgebiet exclusion zone in Namibia, established to protect  
357 diamond deposits (Edwards et al. 2014), has now been proclaimed a National Park (Wiesel 2010).  
358 The consequent changes in the ecological functions of these human modified areas can produce a  
359 new combination of species, sometimes modifying and, in some cases, increasing the local  
360 richness (Hobbs et al. 2006; Pautasso et al. 2011).

361 Studies such as this highlight the complexity of the relationship between wildlife and the human-  
362 modified environment, and suggest that the potential conservation value of industrialised sites  
363 should not be overlooked. This underscores the importance of sound ecological management in

364 these areas. Such sites could be incorporated into wildlife management plans, and could help to  
365 achieve goals such as the conservation of threatened species. This could be achieved, for example,  
366 through the formation of partnerships between industry and the non-profit sector or governmental  
367 agencies, such as the partnership between Eskom and the Endangered Wildlife Trust (EWT) to  
368 reduce the threats posed by electricity infrastructure to wildlife in South Africa (Jenkins et al.  
369 2010).

370

## 371 **5 Conclusion**

372 Servals occur at much greater densities at Secunda than have been recorded elsewhere. Capture  
373 rates on both camera traps and live traps were remarkably high. High densities may be due to  
374 favourable conditions such as a high abundance of rodent prey and the absence of persecution or  
375 competitor species. Despite the highly industrialised nature of the site, serval population structure  
376 appears to be similar to other natural sites. We suggest that the potential value of industrial sites,  
377 where they include areas of relatively natural habitats, may be underappreciated by  
378 conservationists, and that these sites could help meet conservation objectives.

379

## 380 **References**

- 381 van Aarde, R. J., and J. D. Skinner. 1986. Pattern of space use by relocated servals *Felis serval*. *African*  
382 *Journal of Ecology* 24: 97-101. doi:10.1111/j.1365-2028.1986.tb00348.x.
- 383 Balme, G. A., R. Slotow, and L. T. B. Hunter. 2010. Edge effects and the impact of non-protected areas in  
384 carnivore conservation: leopards in the Phinda-Mkhuze Complex, South Africa. *Animal*  
385 *Conservation* 13: 315–323. doi:10.1111/j.1469-1795.2009.00342.x.
- 386 Barbosa, A. M., D. Fontaneto, L. Marini, and M. Pautasso. 2010. Positive regional species–people  
387 correlations: a sampling artefact or a key issue for sustainable development? *Animal Conservation*  
388 13: 446–447. doi:10.1111/j.1469-1795.2010.00402.x.
- 389 Barrows, C. W., M. B. Swartz, W. L. Hodges, M. F. Allen, J. T. Rotenberry, B.-L. Li, T. A. Scott, and X.  
390 Chen. 2005. A framework for monitoring multiple-species conservation plans. *Journal of Wildlife*  
391 *diseases* D9: 1333–1345. doi:10.2193/0022-541X(2005)69[1333:AFFMMC]2.0.CO;2.
- 392 Bateman, P. W., and P. A. Fleming. 2012. Big city life: carnivores in urban environments. *Journal of*  
393 *Zoology* 28: 1–23. doi:10.1111/j.1469-7998.2011.00887.x.
- 394 Blignaut, C., G. Steenkamp, J. Hewlett, D. Loock, R. Emslie, and G. E. Zeiler. In review. Preliminary  
395 findings of free-ranging serval (*Leptailurus serval*) chemical capture.
- 396 Bowland, J. M. 1990. Diet, home range and movement patterns of serval on farmland in Natal.
- 397 Cardillo, M., A. Purvis, W. Sechrest, J. L. Gittleman, J. Bielby, and G. M. Mace. 2004. Human

- 398 population density and extinction risk in the world's carnivores. *PLoS biology* 2: E197.  
399 doi:10.1371/journal.pbio.0020197.
- 400 Chapin, F. S., E. S. Zavaleta, V. T. Eviner, R. L. Naylor, P. M. Vitousek, H. L. Reynolds, D. U. Hooper,  
401 S. Lavorel, O. E. Sala, S. E. Hobbie, M. C. Mack, and S. Díaz. 2000. Consequences of changing  
402 biodiversity. *Nature* 405: 234–242. doi:10.1038/35012241.
- 403 Courbin, N., D. Fortin, and C. Dussault. 2013. Multi-trophic resource selection function enlightens the  
404 behavioural game between wolves and their prey. *Journal of Animal Ecology*: 82(5): 1062–1071.  
405 doi:10.1111/1365-2656.12093.
- 406 Dixon, M. J. R., J. Loh, N. C. Davidson, C. Beltrame, R. Freeman, and M. Walpole. 2016. Tracking  
407 global change in ecosystem area: The Wetland Extent Trends index. *Biological Conservation* 193:  
408 27–35. doi:10.1016/j.biocon.2015.10.023.
- 409 Edwards, D. P., S. Sloan, L. Weng, P. Dirks, J. Sayer, and W. F. Laurance. 2014. Mining and the African  
410 Environment. *Conservation Letters* 7: 302–311. doi:10.1111/conl.12076.
- 411 Efford, M. 2004. Density estimation in live-trapping studies. *Oikos* 106: 598–610. doi:10.1111/j.0030-  
412 1299.2004.13043.x.
- 413 Efford, M. G. 2017. secr: Spatially explicit capture-recapture models. R package version 3.1.3. Available  
414 from <https://cran.R-project.org/package=secur>.
- 415 Ellis, E. C., K. Klein Goldewijk, S. Siebert, D. Deborah Lightman, and N. Ramankutty. 2010.  
416 Anthropogenic transformation of the biomes, 1700 to 2000. *Global Ecology and Biogeography* 19:  
417 589–606. doi:10.1111/j.1466-8238.2010.00540.x/full.
- 418 Ellis, E. C., J. O. Kaplan, D. Q. Fuller, S. Vavrus, K. Klein Goldewijk, and P. H. Verburg. 2013. Used  
419 planet: a global history. *Proceedings of the National Academy of Sciences* 110: 7978–7985.  
420 doi:10.1073/pnas.1217241110.
- 421 Finer, M., and C. N. Jenkins. 2012. Proliferation of hydroelectric dams in the Andean Amazon and  
422 implications for Andes-Amazon connectivity. *PLoS One* 7: e35126.  
423 doi:10.1371/journal.pone.0035126.
- 424 Friedmann, Y., and B. Daly. 2004. *Red Data Book of the Mammals of South Africa: a Conservation*  
425 *Assessment*. Johannesburg: Endangered Wildlife Trust.
- 426 Fuller, T., S. Destefano, and P. S. Warren. 2010. Carnivore behavior, ecology and relationship to  
427 urbanization. In *Urban Carnivores: Ecology, Conflict, and Conservation*, ed. S. D. Gehrt, S. P. D.  
428 Riley, and B. L. Cypher, 13–20. Baltimore: Johns Hopkins University Press.
- 429 Geertsema, A. A. 1985. Aspects of the ecology of the serval *Leptailurus serval* in the Ngorongoro Crater,  
430 Tanzania. *Netherlands Journal of Zoology* 35: 527–610. doi:10.1163/002829685X00217.
- 431 Google. 2014. Satellite imagery. Sources: CNES/Airbus. Image date 01 May 2014. Accessed May 10,  
432 2014. Available from <https://www.google.co.za/maps>.
- 433 Harris, N. C., M. J. Kauffman, and L. S. Mills. 2008. Inferences about ungulate population dynamics  
434 derived from age ratios. *Journal of Wildlife Management* 72: 1143–1151. doi:10.2193/2007-277.
- 435 Henley, S. 1997. On the proposed reintroduction of serval (*Felis serval*) into the Great Fish River  
436 Reserve, Eastern Cape. Port Elizabeth: University of Port Elizabeth.
- 437 Hobbs, R. J., S. Arico, J. Aronson, J. S. Baron, P. Bridgewater, V. A. Cramer, P. R. Epstein, J. J. Ewel, et  
438 al. 2006. Novel ecosystems: theoretical and management aspects of the new ecological world order.  
439 *Global Ecology and Biogeography* 15: 1–7. doi:10.1111/j.1466-822X.2006.00212.x.
- 440 Houser, A., M. J. Somers, and L. K. Boast. 2009. Home range use of free-ranging cheetah on farm and  
441 conservation land in Botswana. *South African Journal of Wildlife Research* 39: 11–22.  
442 doi:10.3957/056.039.0102.
- 443 Ibisch, P. L., M. T. Hoffmann, S. Kreft, G. Pe'er, V. Kati, L. Biber-Freudenberger, D. A. DellaSala, M.  
444 M. Vale, P. R. Hobson, and N. Selva. 2016. A global map of roadless areas and their conservation  
445 status 354: 1423–1427. doi:10.1126/science.aaf7166.
- 446 Jackson, C. R., R. J. Power, R. J. Groom, E. H. Masenga, E. E. Mjinga, R. D. Fyumagwa, E. Røskaft, and



- 447 H. Davies-Mostert. 2014. Heading for the hills: risk avoidance drives den site selection in African  
448 wild dogs. *PLoS One* 9: e99686. doi:10.1371/journal.pone.0099686.
- 449 Jenkins, A. R., J. J. Smallie, and M. Diamond. 2010. Avian collisions with power lines: a global review of  
450 causes and mitigation with a South African perspective. *Bird Conservation International* 20: 263–  
451 278. doi:10.1017/S0959270910000122.
- 452 Kamler, J. F., H. T. Davies-Mostert, L. Hunter, and D. W. Macdonald. 2007. Predation on black-backed  
453 jackals (*Canis mesomelas*) by African wild dogs (*Lycaon pictus*). *African Journal of Ecology* 45:  
454 667–668. doi:10.1111/j.1365-2028.2007.00768.x.
- 455 Kie, J. G., R. Terry Bowyer, M. C. Nicholson, B. B. Boroski, and E. R. Loft. 2002. Landscape  
456 heterogeneity at differing scales: Effects on spatial distribution of mule deer. *Ecology* 83: 530-544.  
457 doi:10.2307/2680033.
- 458 Kingdon, J., and M. Hoffmann, eds. 2012. *Mammals of Africa*. New York: Bloomsbury.
- 459 Laurance, W. F., M. Goosem, and S. G. W. Laurance. 2009. Impacts of roads and linear clearings on  
460 tropical forests. *Trends in Ecology & Evolution* 24: 659–669. doi:10.1016/j.tree.2009.06.009.
- 461 Laurance, W. F., A. Peletier-Jellema, B. Geenen, H. Koster, P. Verweij, P. Van Dijck, T. E. Lovejoy, J.  
462 Schleicher, and M. van Kuijk. 2015. Reducing the global environmental impacts of rapid  
463 infrastructure expansion. *Current Biology* 25: R259–262. doi:10.1016/j.cub.2015.02.050.
- 464 Lindenmayer, D. B., J. Fischer, A. Felton, M. Crane, D. Michael, C. Macgregor, R. Montague-Drake, A.  
465 Manning, and R. J. Hobbs. 2008. Novel ecosystems resulting from landscape transformation create  
466 dilemmas for modern conservation practice. *Conservation Letters* 1: 129-135. doi:10.1111/j.1755-  
467 263x.2008.00021.x.
- 468 Linström, A. 2012. *Sasol: Secunda Wetland Study*. Wet Earth Eco-Specs, Lydenburg.
- 469 Loock, D., S. Williams, K. Emslie, M. Somers, W. S. Matthews, and L. Swanepoel. 2018. Serval  
470 (*Leptailurus serval*) camera trap and live trap dataset at Secunda, South Africa. Figshare. Accessed  
471 22 March 2018. Available from <https://figshare.com/s/bec3a5d725d8c11a5842>.  
472 doi:10.6084/m9.figshare.5729124.
- 473 Marnewick, K., A. Beckhelling, D. Cilliers, E. Lane, G. Mills, K. Herring, P. Caldwell, R. Hall, and S.  
474 Meintjes. 2007. The status of the cheetah in South Africa. *Cat News Special Issue 3 – Cheetahs in*  
475 *Southern Africa*: 22–31.
- 476 Matthews, W. S. 2016. *Baseline assessment of state of terrestrial flora for the “secondary area” of the*  
477 *SASOL Secunda site. Part of the state of biodiversity assessment – WetEarth*. WSM Eco Services,  
478 Nelspruit.
- 479 McGregor, H. W., J. O. Hampton, D. Lisle, and S. Legge. 2016. Live-capture of feral cats using tracking  
480 dogs and darting, with comparisons to leg-hold trapping. *Wildlife Research* 43: 313–322.  
481 doi:10.1071/WR15134.
- 482 McKinney, M. L. 2002. Urbanization, biodiversity, and conservation: the impacts of urbanization on  
483 native species are poorly studied, but educating a highly urbanized human population about these  
484 impacts can greatly improve species conservation in all ecosystems. *BioScience* 52: 883–890.  
485 doi:10.1641/0006-3568(2002)052[0883:UBAC]2.0.CO;2.
- 486 Michalski, F., P. G. Crawshaw Jr, T. G. de Oliveira, and M. E. Fabián. 2007. Efficiency of box-traps and  
487 leg-hold traps with several bait types for capturing small carnivores (Mammalia) in a disturbed area  
488 of southeastern Brazil. *Revista de Biologia Tropical* 55: 315–320.
- 489 Molsher, R. L. 2001. Trapping and demographics of feral cats (*Felis catus*) in central New South Wales.  
490 *Wildlife Research* 28: 631–636. doi:10.1071/WR00027.
- 491 Morris-Drake, A., A. M. Bracken, and J. M. Kern. 2017. Anthropogenic noise alters dwarf mongoose  
492 responses to heterospecific alarm calls. *Environmental pollution* . 223: 476-483.  
493 doi:10.1016/j.envpol.2017.01.049.
- 494 Mucina, L., and M. C. Rutherford. 2006. *The Vegetation of South Africa, Lesotho and Swaziland*.  
495 Pretoria: South African National Biodiversity Institute.

- 496 Northrup, J. M., and G. Wittemyer. 2013. Characterising the impacts of emerging energy development on  
497 wildlife, with an eye towards mitigation. *Ecology Letters* 16: 112–125. doi:10.1111/ele.12009.
- 498 Pautasso, M., K. Böhning-Gaese, P. Clergeau, V. R. Cueto, M. Dinetti, E. Fernández-Juricic, M.-L.  
499 Kaisanlahti-Jokimäki, J. Jokimäki, M. L. McKinney, N. S. Sodhi, D. Storch, L. Tomialojc, P. J.  
500 Weisberg, J. Woinarski, R. A. Fuller, and E. Cantarello. 2011. Global macroecology of bird  
501 assemblages in urbanized and semi-natural ecosystems. *Global Ecology and Biogeography* 20: 426–  
502 436. doi:10.1111/j.1466-8238.2010.00616.x.
- 503 Perrin, M. R. 2002. Space use by a reintroduced serval in Mount Currie Nature Reserve. *South African*  
504 *Journal of Wildlife Research* 32: 79–86.
- 505 Raiter, K. G., H. P. Possingham, S. M. Prober, and R. J. Hobbs. 2014. Under the radar: mitigating  
506 enigmatic ecological impacts. *Trends in Ecology & Evolution* 29: 635–644.  
507 doi:10.1016/j.tree.2014.09.003.
- 508 Ramesh, T., and C. T. Downs. 2015/2. Impact of land use on occupancy and abundance of terrestrial  
509 mammals in the Drakensberg Midlands, South Africa. *Journal for Nature Conservation* 23: 9–18.  
510 doi:10.1016/j.jnc.2014.12.001.
- 511 Ramesh, T., and C. T. Downs. 2013. Impact of farmland use on population density and activity patterns  
512 of serval in South Africa. *Journal of Mammalogy* 94: 1460–1470. doi:10.1644/13-MAMM-A-063.1.
- 513 Ramesh, T., and C. T. Downs. 2015. Diet of serval (*Leptailurus serval*) on farmlands in the Drakensberg  
514 Midlands, South Africa. *Mammalia*. doi:10.1515/mammalia-2014-0053.
- 515 Ramesh, T., R. Kalle, and C. T. Downs. 2015. Sex-specific indicators of landscape use by servals:  
516 Consequences of living in fragmented landscapes. *Ecological Indicators* 52: 8–15.  
517 doi:10.1016/j.ecolind.2014.11.021.
- 518 Ramesh, T., R. Kalle, and C. T. Downs. 2016. Spatiotemporal variation in resource selection of servals:  
519 insights from a landscape under heavy land-use transformation. *Journal of Mammalogy* 97: 554–  
520 567. doi:10.1093/jmammal/gyv201.
- 521 R Development Core Team. 2017. *R: A language and environment for statistical computing. Version*  
522 *3.4.3. R Foundation for statistical computing, Vienna. Available from <https://www.R-project.org/>.*
- 523 Ripple, W. J., J. A. Estes, R. L. Beschta, C. C. Wilmers, E. G. Ritchie, M. Hebblewhite, J. Berger, B.  
524 Elmhagen, M. Letnic, M. P. Nelson, O. J. Schmitz, D. W. Smith, A. D. Wallach, and A. J. Wirsing.  
525 2014. Status and ecological effects of the world’s largest carnivores. *Science* 343: 1241484–  
526 1241484. doi:10.1126/science.1241484.
- 527 Ritchie, E. G., and C. N. Johnson. 2009. Predator interactions, mesopredator release and biodiversity  
528 conservation. *Ecology Letters* 12: 982–998. doi:10.1111/j.1461-0248.2009.01347.x.
- 529 Royle, J. A., J. Andrew Royle, A. K. Fuller, and C. Sutherland. 2015. Spatial capture–recapture models  
530 allowing Markovian transience or dispersal. *Population Ecology* 58: 53–62. doi:10.1007/s10144-  
531 015-0524-z.
- 532 Sax, D. F., and S. D. Gaines. 2003. Species diversity: from global decreases to local increases. *Trends in*  
533 *Ecology & Evolution* 18: 561–566. doi:10.1016/S0169-5347(03)00224-6.
- 534 Scott, D. M., M. J. Berg, B. A. Tolhurst, A. L. M. Chauvenet, G. C. Smith, K. Neaves, J. Lochhead, and  
535 P. J. Baker. 2014. Changes in the distribution of red foxes (*Vulpes vulpes*) in urban areas in Great  
536 Britain: findings and limitations of a media-driven nationwide survey. *PLoS One* 9: e99059.  
537 doi:10.1371/journal.pone.0099059.
- 538 Skinner, J. D., and C. T. Chimimba. 2005. *The Mammals of the Southern African Sub-region*. Cambridge:  
539 Cambridge University Press.
- 540 Sloan, S., B. Bertzky, and W. F. Laurance. 2016. African development corridors intersect key protected  
541 areas. *African Journal of Ecology* 55: 731–737. doi:10.1111/aje.12377.
- 542 Smallie, J. J., and T. G. O’connor. 2000. Elephant utilization of *Colophospermum mopane*: possible  
543 benefits of hedging. *African Journal of Ecology* 38: 352–359. doi:10.1046/j.1365-  
544 2028.2000.00258.x.

- 545 Sollmann, R., M. M. Furtado, B. Gardner, H. Hofer, A. T. A. Jácomo, N. M. Tôrres, and L. Silveira.  
546 2011/3. Improving density estimates for elusive carnivores: Accounting for sex-specific detection  
547 and movements using spatial capture–recapture models for jaguars in central Brazil. *Biological*  
548 *conservation* 144: 1017–1024.
- 549 Sunquist, M., and F. Sunquist. 2002. *Wild Cats of the World*. University of Chicago Press.
- 550 Taylor, P. J. 2013. *Otomys irroratus* Southern African vlei rat. In *Mammals of Africa: Rodents, Hares*  
551 *and Rabbits*, ed. D. C. D. Happold, 583–585. London: Bloomsbury.  
552 doi:10.5040/9781472926937.0355.
- 553 Thiel, C. 2011. Ecology and population status of the Serval *Leptailurus serval* (Schreber, 1776) in  
554 Zambia. PhD Thesis, University of Bonn.
- 555 Thiel, C. 2015. *Leptailurus serval*. *The IUCN Red List of Threatened Species 2015: e.T11638A50654625*.  
556 doi:10.2305/IUCN.UK.2015-2.RLTS.T11638A50654625.en.
- 557 Tobler, M. W., and G. V. N. Powell. 2013. Estimating jaguar densities with camera traps: Problems with  
558 current designs and recommendations for future studies. *Biological Conservation* 159: 109–118.  
559 doi:10.1016/j.biocon.2012.12.009.
- 560 United Nations Environment Programme. 2012. *Global environmental outlook 5: environment for the*  
561 *future we want*. United Nations Environment Programme, Valletta.
- 562 Wegge, P., C. P. Pokheral, and S. R. Jnawali. 2004. Effects of trapping effort and trap shyness on  
563 estimates of tiger abundance from camera trap studies. *Animal Conservation* 7: 251–256. doi:  
564 10.1017/S1367943004001441.
- 565 de Wet, F. 2016. *Veld condition assessment and management within Sasol grasslands*. EnviroPulse,  
566 Hilton.
- 567 Wiesel, I. 2010. Killing of Cape fur seal (*Arctocephalus pusillus pusillus*) pups by brown hyenas  
568 (*Parahyaena brunnea*) at mainland breeding colonies along the coastal Namib Desert. *Acta*  
569 *Ethologica* 13: 93–100. doi:10.1007/s10211-010-0078-1.
- 570 Williams, N., M. W. Schwartz, and P. A. Vesk. 2009. A conceptual framework for predicting the effects  
571 of urban environments on floras. *Journal of Ecology* 97: 4–9. doi: 10.1111/j.1365-  
572 2745.2008.01460.x.
- 573 Williams, S. T., N. Maree, P. Taylor, S. R. Belmain, M. Keith, and L. H. Swanepoel. 2018. Predation by  
574 small mammalian carnivores in rural agro-ecosystems: An undervalued ecosystem service?  
575 *Ecosystem Services*. doi:10.1016/j.ecoser.2017.12.006.
- 576 Zarfl, C., A. E. Lumsdon, J. Berlekamp, L. Tydecks, and K. Tockner. 2014. A global boom in  
577 hydropower dam construction. *Aquatic Sciences* 77: 161–170. doi:10.1007/s00027-014-0377-0.
- 578

## 579 **Competing interests**

580 DJEL author is a full-time employee of Secunda Synfuels Operations (a division of Sasol South  
581 Africa (Pty) Ltd) as Land & Biodiversity Manager. Secunda Synfuels Operations had no role in  
582 study design, data collection and analysis, decision to publish, or preparation of the manuscript.  
583 STW, KWE, WSM, and LHS declare that they have no potential competing interests.

584

## 585 **Acknowledgements**

586 We would like to thank Secunda Synfuels Operations > Div of Sasol South Africa (Pty) Ltd. for  
587 supporting this research, the Faculty of Natural and Agricultural Science, University of the Free  
588 State, and the Wildlife Resource Association (WRA). STW was supported by a postdoctoral grant  
589 from the University of Venda. LHS was supported by the National Research Foundation of South  
590 Africa (Grant Nr: 107099) and the University of Venda. We are grateful to Chris Sutherland for  
591 advice on SECR modelling. Finally, we would like to thank Matt Hayward and an anonymous  
592 reviewer for their suggestions, which helped to improve the manuscript.

593

## 594 **Author Biographies**

595 Daan Loock is a Land & Biodiversity Manager at Secunda Synfuels Operations > Div of Sasol  
596 South Africa (Pty) Ltd. He is currently involved in biodiversity studies and especially a serval  
597 research program for the last couple of years. Address: Secunda Synfuels Operations, Private Bag  
598 X1000, Secunda, 2302, South Africa. Email: [daan.loock@sasol.com](mailto:daan.loock@sasol.com).

599 Samuel T. Williams is a Postdoctoral Research Fellow in the Department of Zoology at the  
600 University of Venda. His research centres around the theme of carnivores in the Anthropocene,  
601 including carnivore conservation, road ecology, and ecosystem services. Address: Department of  
602 Zoology, School of Mathematical & Natural Sciences, University of Venda, Private Bag X5050,  
603 Thohoyandou 0950, South Africa. Email: [samual.t.williams@gmail.com](mailto:samual.t.williams@gmail.com).

604 Kevin W. Emslie is an MSc. candidate in the Department of Zoology at the University of Venda.  
605 His research focuses on the impacts of human-modified landscapes on small- and mesocarnivore  
606 ecology. Address: Department of Zoology, School of Mathematical & Natural Sciences,  
607 University of Venda, Private Bag X5050, Thohoyandou 0950, South Africa. Email:  
608 [kevin.emslie@gmail.com](mailto:kevin.emslie@gmail.com).

609 Wayne S. Matthews has completed his MSc and PhD, which dealt with the vegetation and ecology  
610 of the North-eastern Mountain Sourveld, and ecology with dynamics of Sand Forest of  
611 Maputaland. Address: Wildlife Resource Association, PO Box 1288, Umhlali, 4390, South Africa.  
612 Email: [wayne@wra-africa.net](mailto:wayne@wra-africa.net).

613 Lourens H. Swanepoel is a Senior Lecturer in Conservation Biology at the Department of Zoology,  
614 University of Venda. His research interests include carnivore conservation, human carnivore  
615 conflict and ecosystem services. Address: Department of Zoology, School of Mathematical &  
616 Natural Sciences, University of Venda, Private Bag X5050, Thohoyandou 0950, South Africa.  
617 Email: [lourens.swanepoel.univen@gmail.com](mailto:lourens.swanepoel.univen@gmail.com).



618 **Supplementary information**

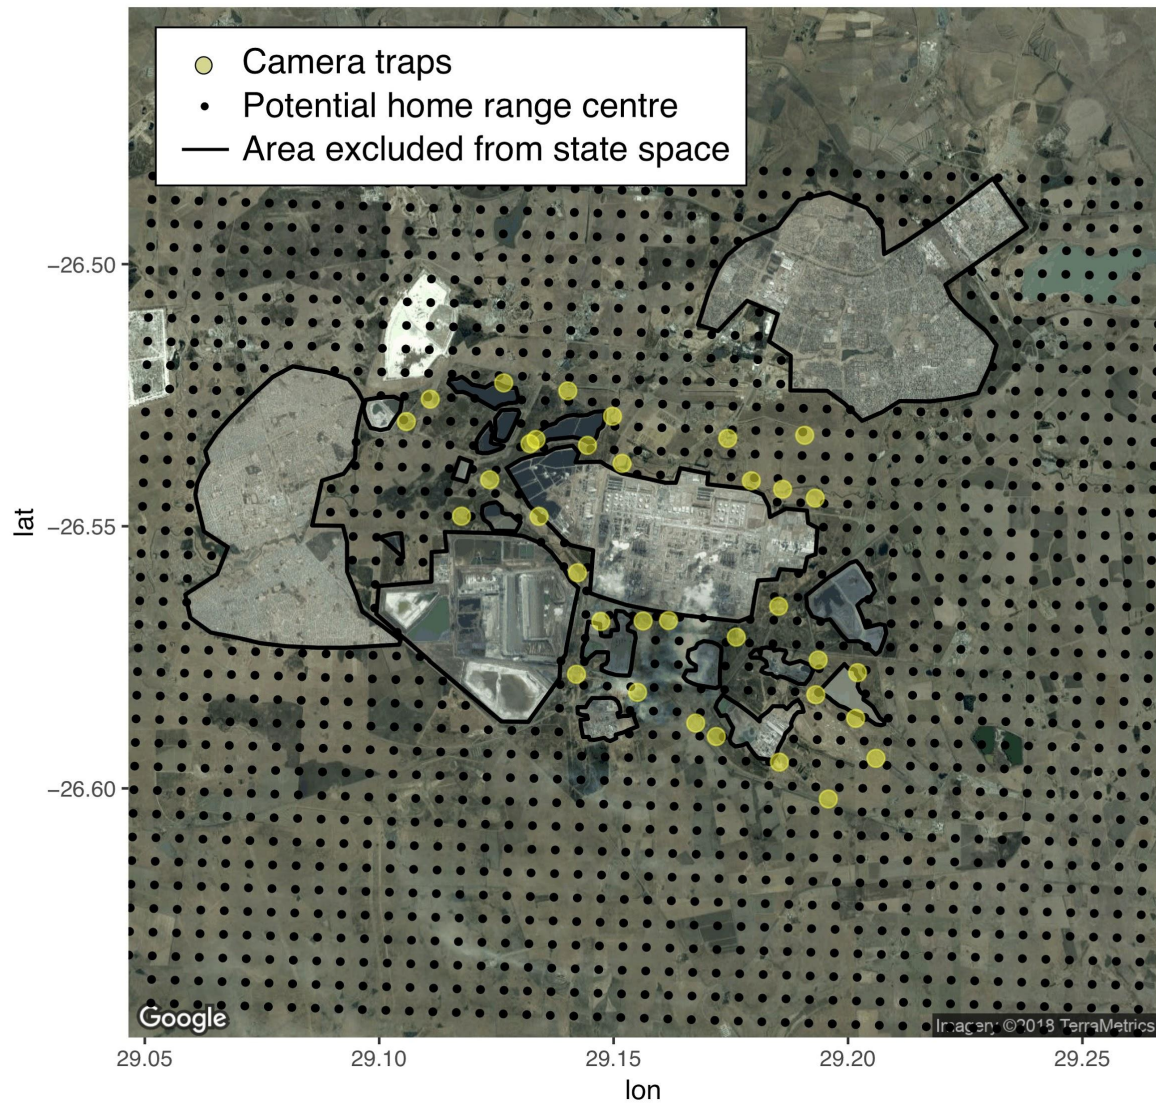

619

620 Fig. S1. Map of Secunda in South Africa showing the locations of camera traps and potential home  
621 range centres, illustrating the areas excluded from the state space.

622

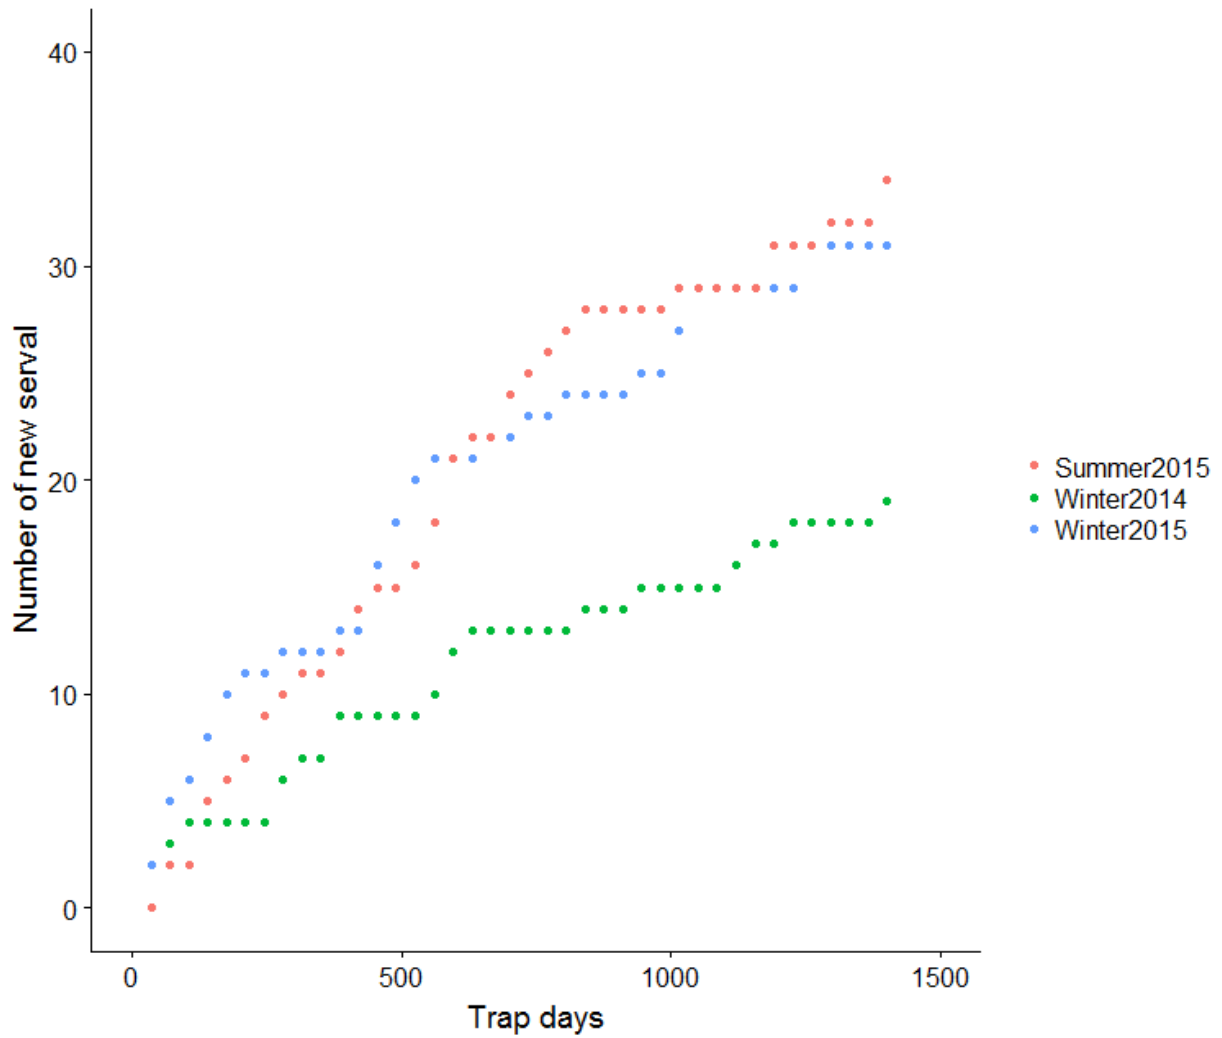

623

624 Fig. S2. Cumulative frequency curve showing the relationship between the cumulative number of  
625 individual serval identified on the camera traps at Secunda in South Africa.

626

627

628

629

630

631 Table S3. Modelling results showing: a) (Mhab.sec) the effect of habitat type on detection  
 632 probability (g0); b) (Mdens.habitat) the effect of session on density and habitat on detection  
 633 probability; c) as model b, but allows the scale parameter (sigma) to vary with session; d) (Mb.sec)  
 634 the effect of behavioural response on detection probability; e) (Mseason) the effect of density  
 635 affected by season and year; and f) (m0.sec) the null model.

|                       | model                                            | detectfn       | npar | logLik               | AIC         | AICc        | dAICc | AICc<br>wt |
|-----------------------|--------------------------------------------------|----------------|------|----------------------|-------------|-------------|-------|------------|
| Mhab.sec              | D~1<br>g0~Habitat<br>sigma~1<br>z~1              | hazard<br>rate | 7    | -<br>1015.426<br>872 | 2044.8<br>5 | 2046.3<br>3 | 0.00  | 0.47       |
| Mdens.habit<br>at     | D~session<br>g0~Habitat<br>sigma~1<br>z~1        | hazard<br>rate | 9    | -<br>1012.996<br>398 | 2043.9<br>9 | 2046.4<br>3 | 0.10  | 0.45       |
| Mdens.habit<br>at.ses | D~session<br>g0~Habitat<br>sigma~sessi<br>on z~1 | hazard<br>rate | 11   | -<br>1012.124<br>715 | 2046.2<br>5 | 2049.9<br>2 | 3.59  | 0.08       |
| Mb.sec                | D~1 g0~b<br>sigma~1<br>z~1                       | hazard<br>rate | 5    | -<br>1028.514<br>939 | 2067.0<br>3 | 2067.8<br>0 | 21.47 | 0.00       |
| Mseason               | D~session<br>g0~1<br>sigma~1<br>z~1              | hazard<br>rate | 6    | -<br>1030.089<br>274 | 2072.1<br>8 | 2073.2<br>7 | 26.94 | 0.00       |
| M0.sec                | D~1 g0~1<br>sigma~1<br>z~1                       | hazard<br>rate | 4    | -<br>1033.592<br>632 | 2075.1<br>9 | 2075.6<br>9 | 29.37 | 0.00       |

636

637
